# Supplementary material for: Gender-specific associations of pregnancy-related anxiety with placental epigenetic patterning of glucocorticoid response genes and preschooler’s emotional symptoms and hyperactivity
Source: Springer Nature journal article supplement (doi:10.1186/s12887-021-02938-z), 2021-10-29
Supplement: MOESM2 [file 19811842]

**Hui Liu et al. Gender-specific associations of pregnancy-related anxiety with placental epigenetic patterning of glucocorticoid response genes and preschooler’s emotional symptoms and hyperactivity**

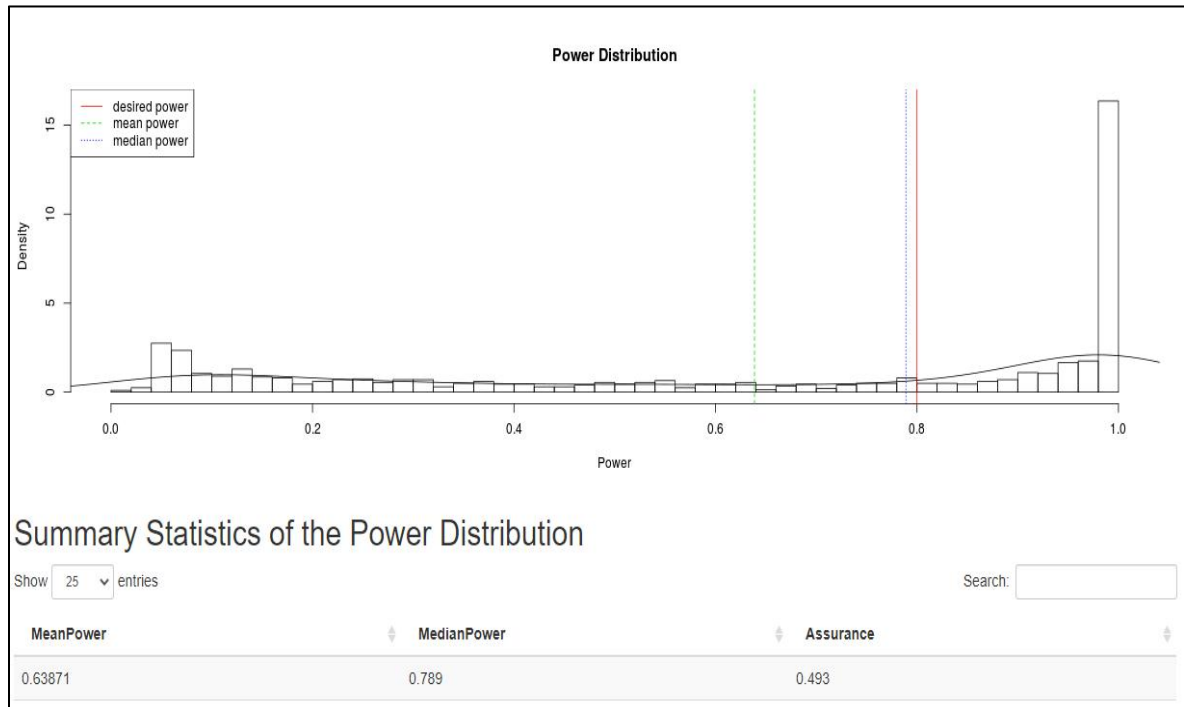

The power of sex-specific mediating role of the latent methylation factor 1 in the relationship between maternal pregnancy-related anxiety and children’s emotional symptoms in boys.

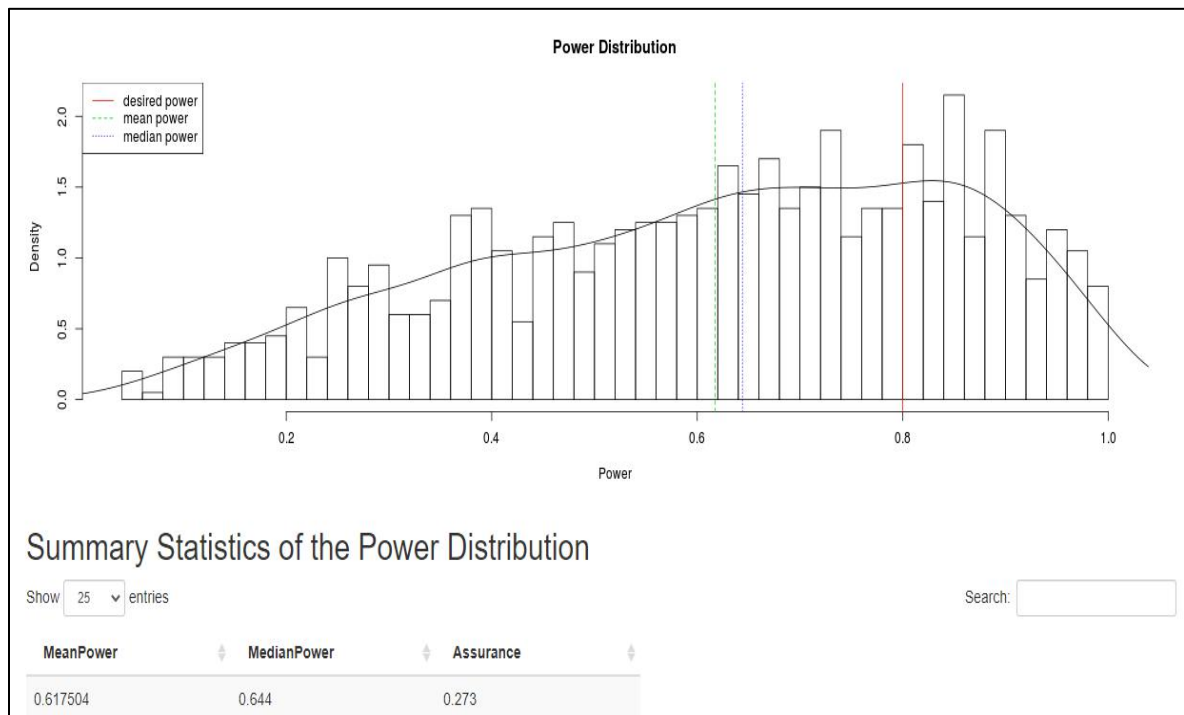

The power of sex-specific mediating role of the latent methylation factor 4 in the relationship between maternal pregnancy-related anxiety and children’s emotional symptoms in boys.

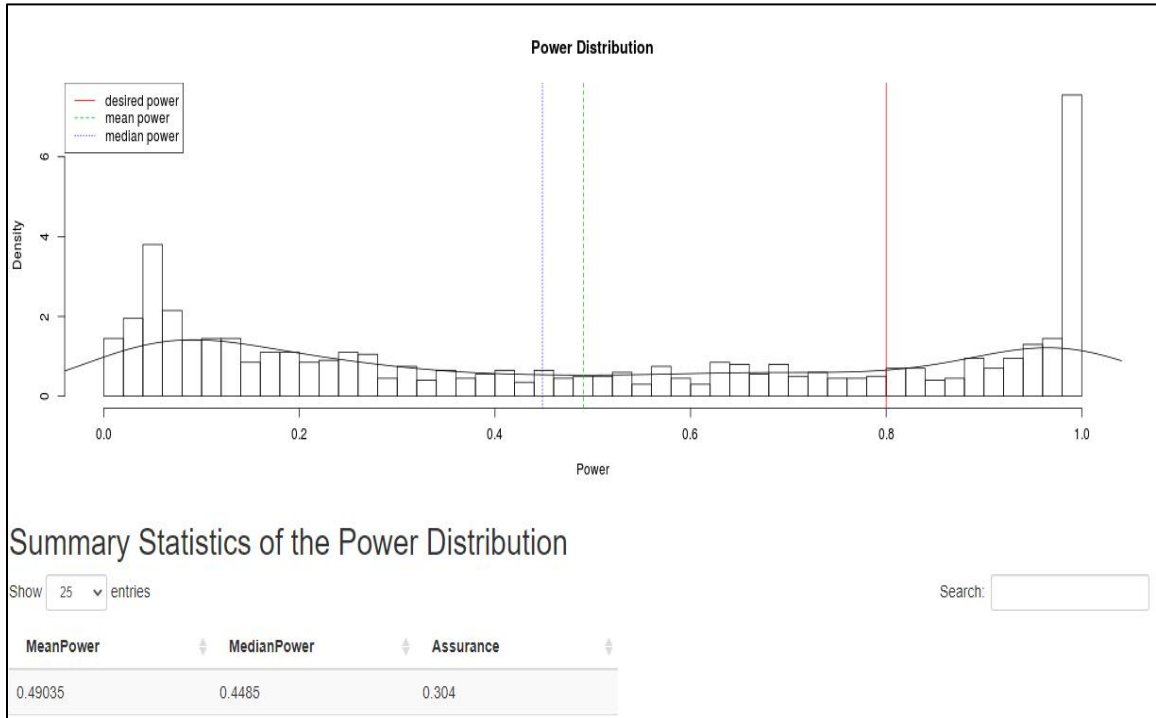

The power of sex-specific mediating role of the latent methylation factor 5 in the relationship between maternal pregnancy-related anxiety and children’s emotional symptoms in boys.

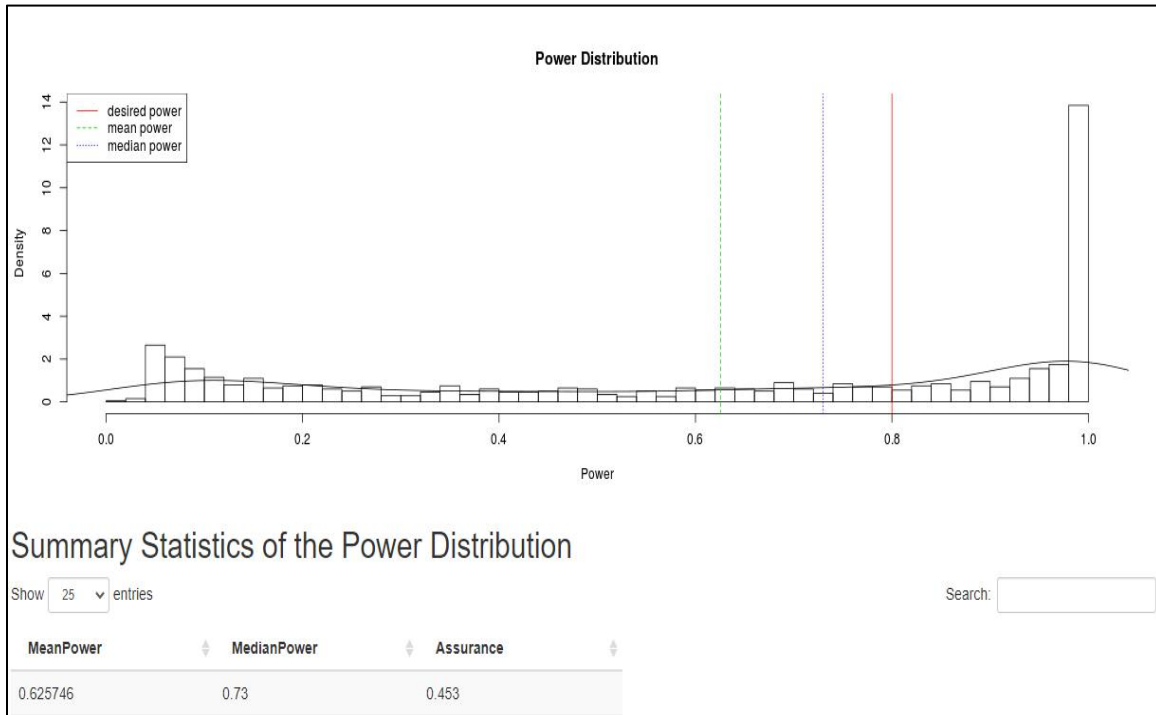

The power of sex-specific mediating role of the latent methylation factor 1 in the relationship between maternal pregnancy-related anxiety and children’s hyperactivity in boys.

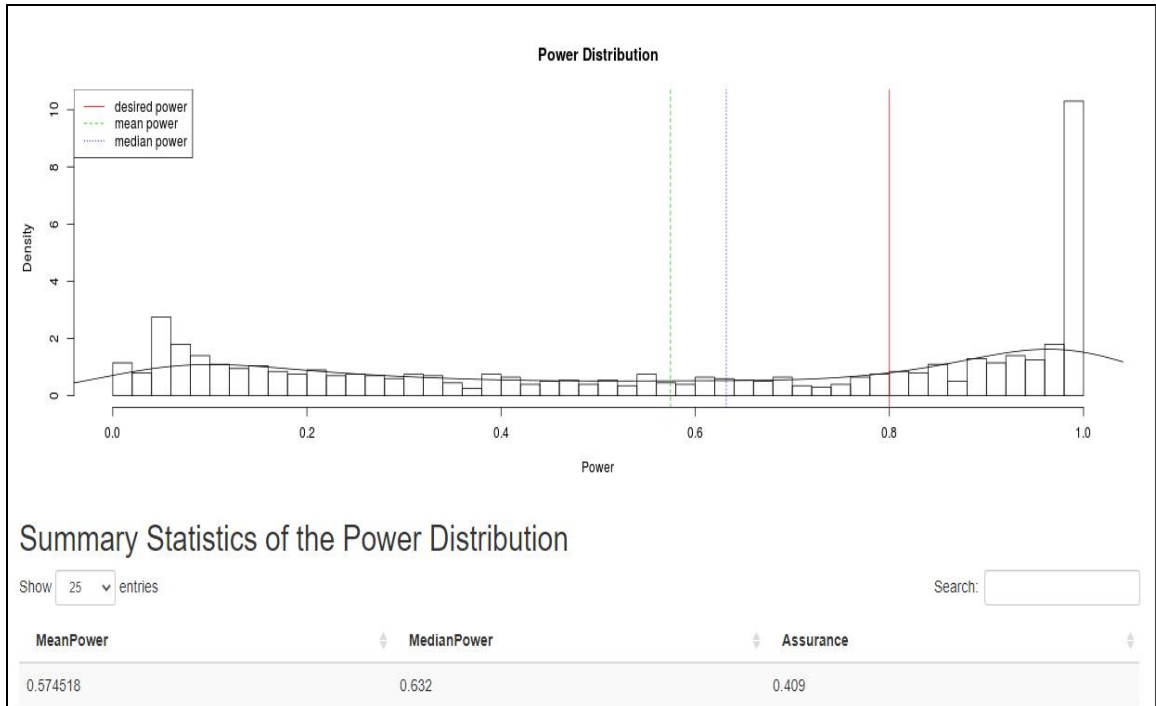

The power of sex-specific mediating role of the latent methylation factor 4 in the relationship between maternal pregnancy-related anxiety and children's hyperactivity in boys

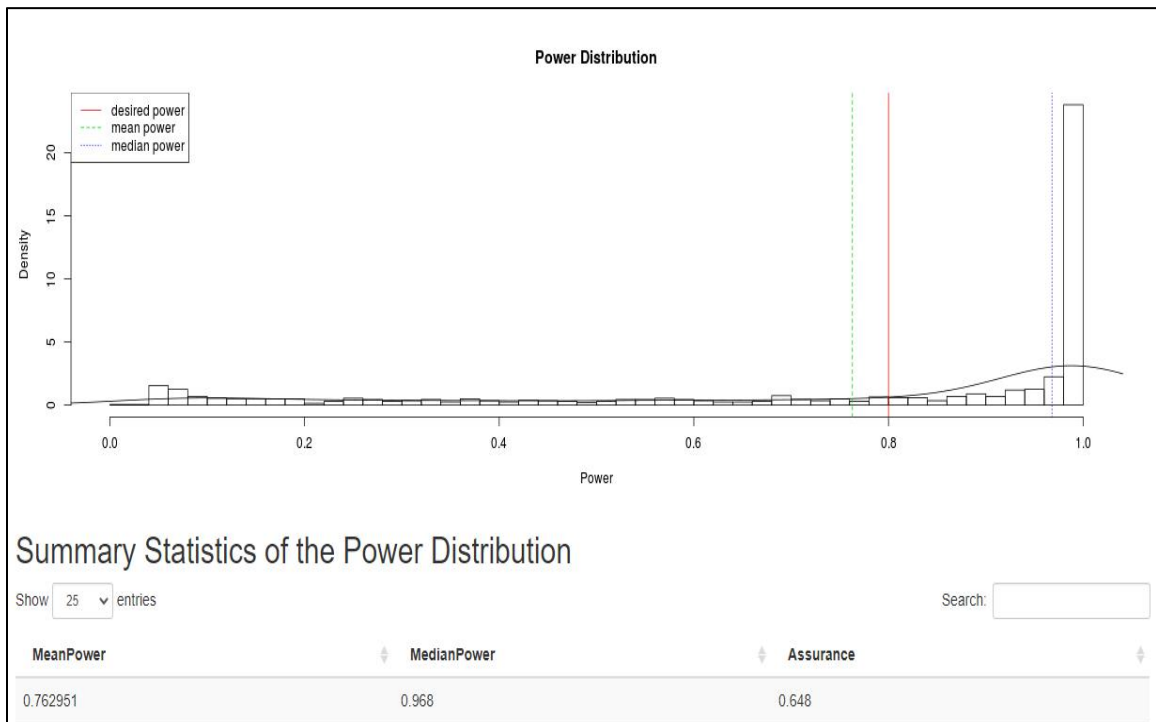

The power of sex-specific mediating role of the latent methylation factor 5 in the relationship between maternal pregnancy-related anxiety and children's hyperactivity in boys

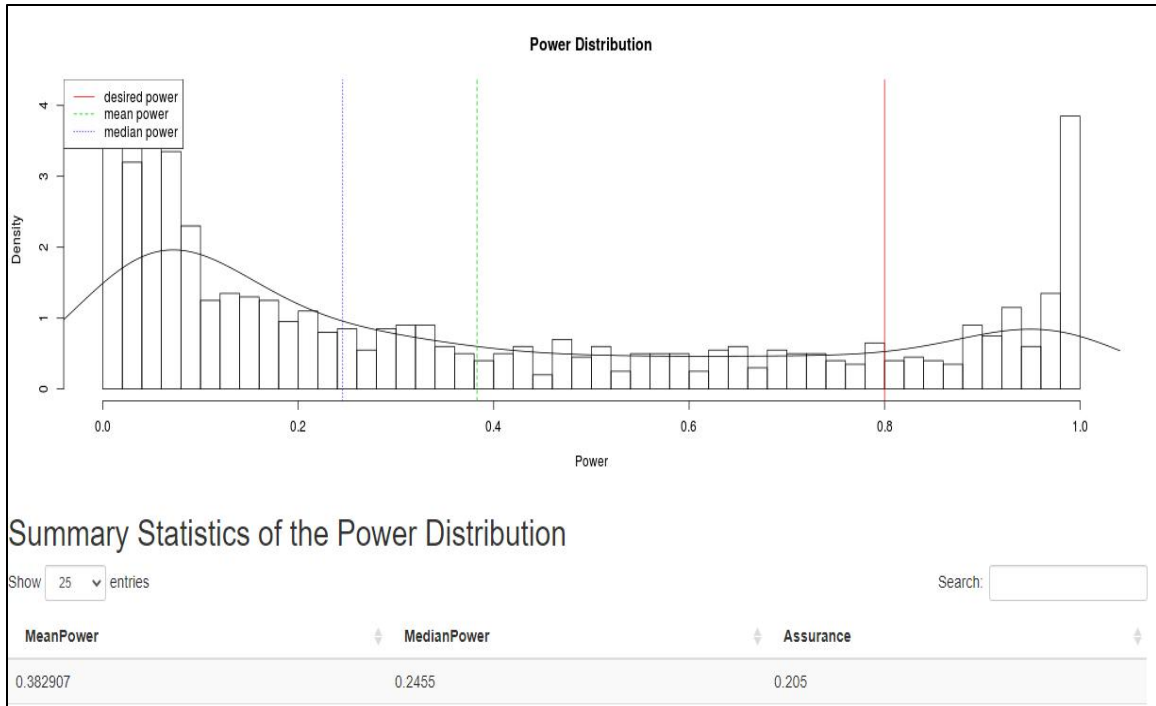

The power of sex-specific mediating role of the latent methylation factor 1 in the relationship between maternal pregnancy-related anxiety and children’s emotional symptoms in girls.

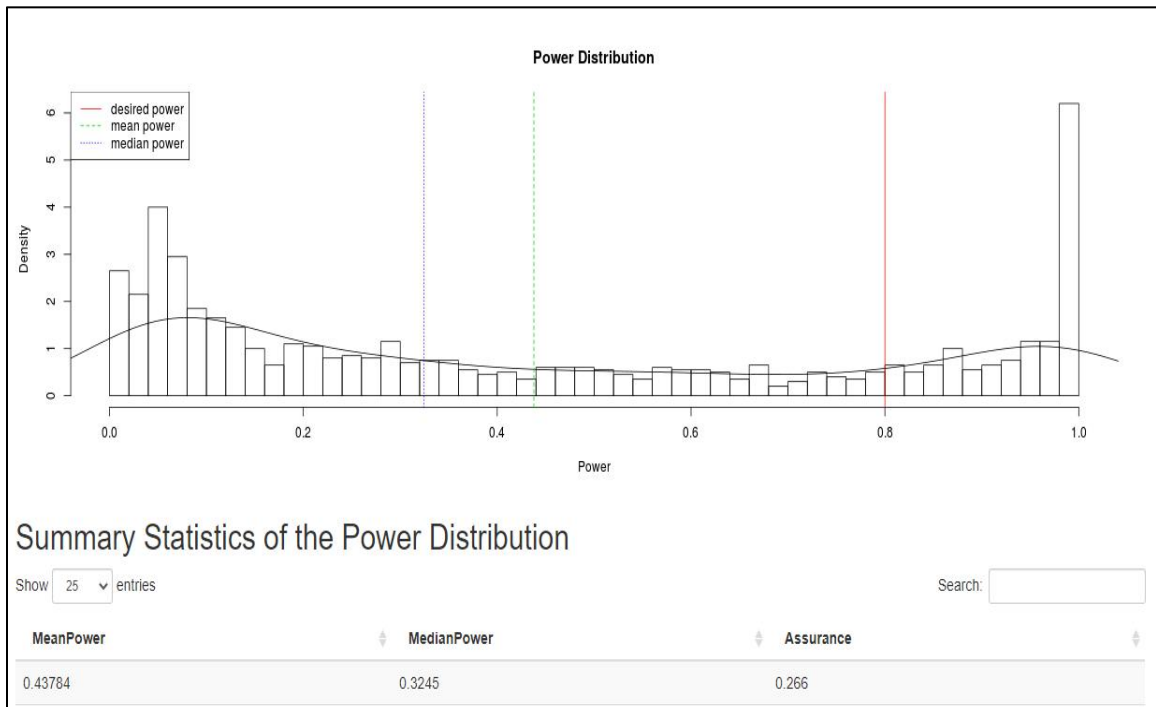

The power of sex-specific mediating role of the latent methylation factor 4 in the relationship between maternal pregnancy-related anxiety and children’s emotional symptoms in girls.

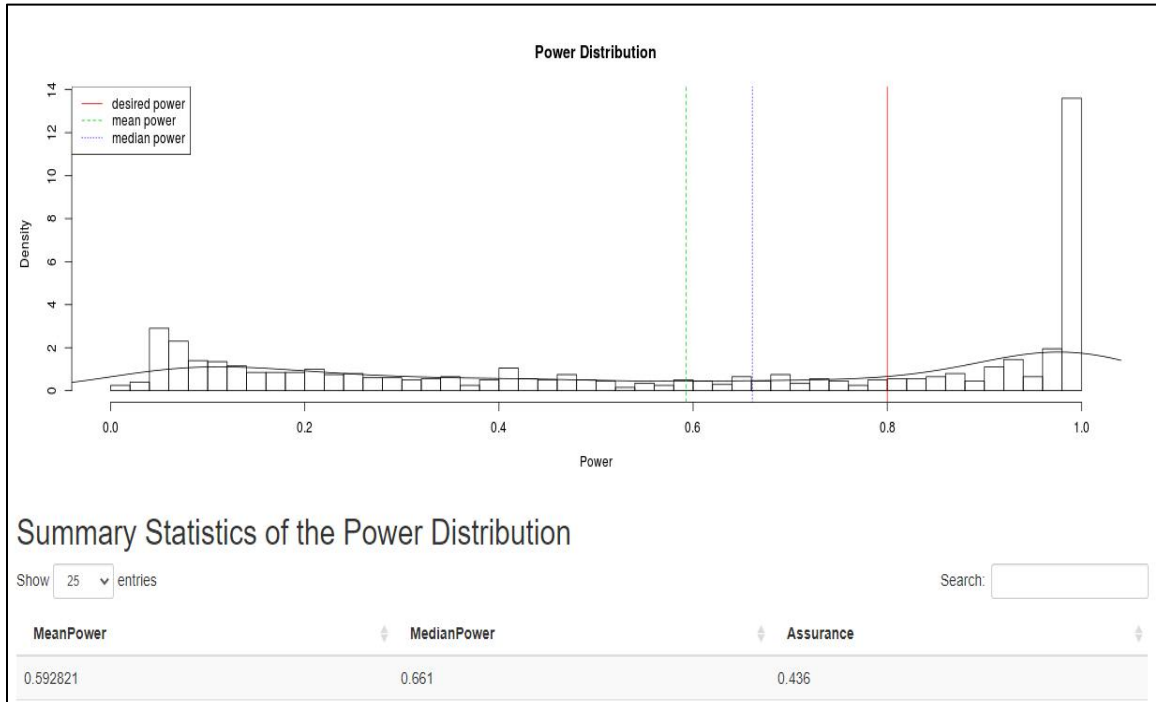

The power of sex-specific mediating role of the latent methylation factor 5 in the relationship between maternal pregnancy-related anxiety and children’s emotional symptoms in girls.

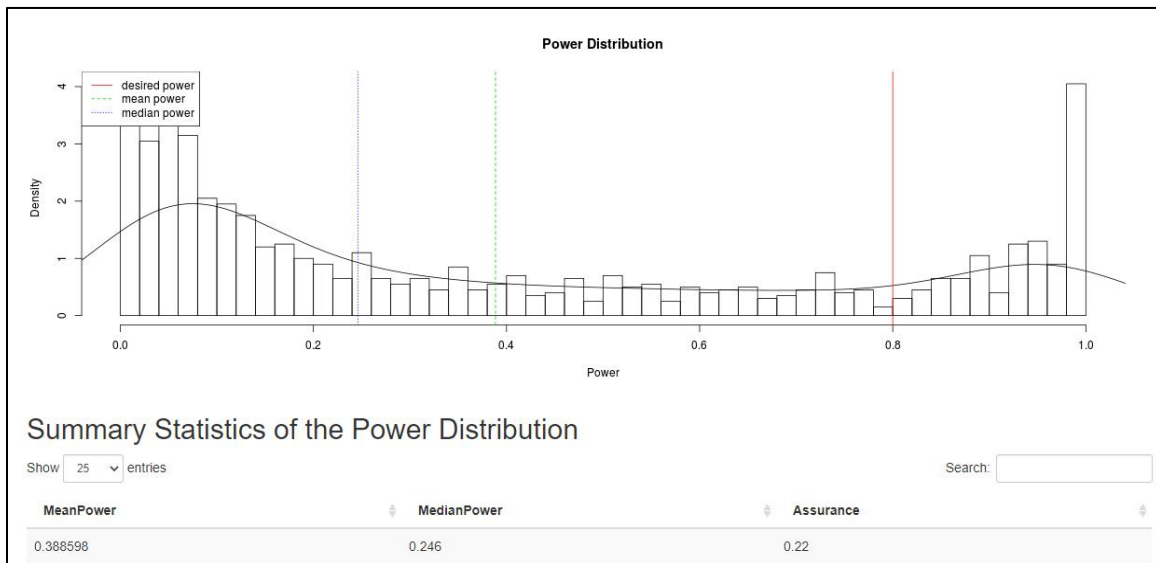

The power of sex-specific mediating role of the latent methylation factor 1 in the relationship between maternal pregnancy-related anxiety and children’s hyperactivity in girls

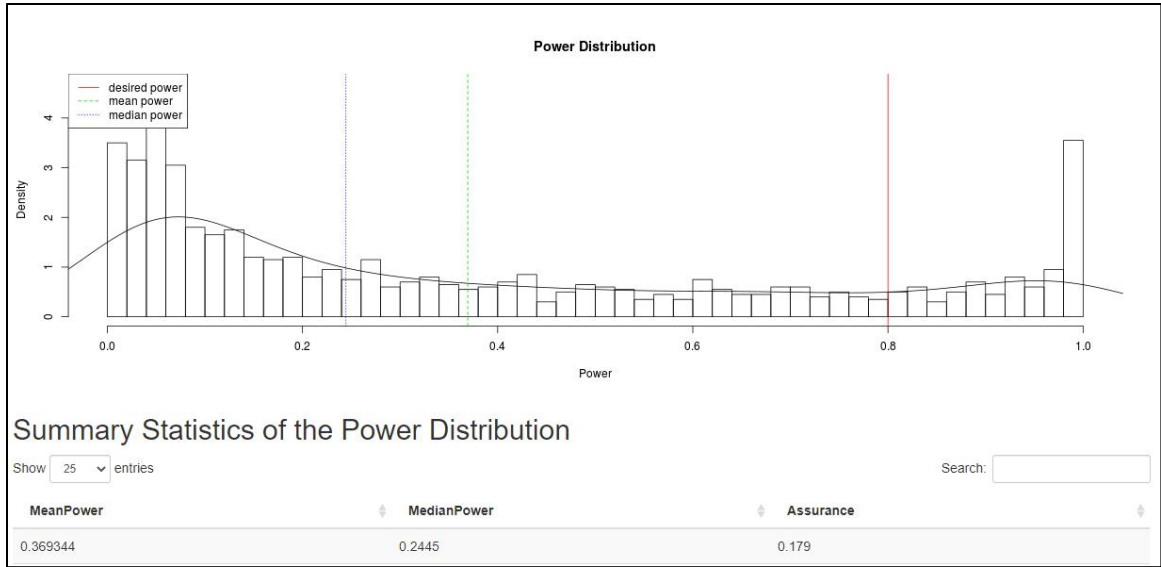

The power of sex-specific mediating role of the latent methylation factor 4 in the relationship between maternal pregnancy-related anxiety and children's hyperactivity in girls

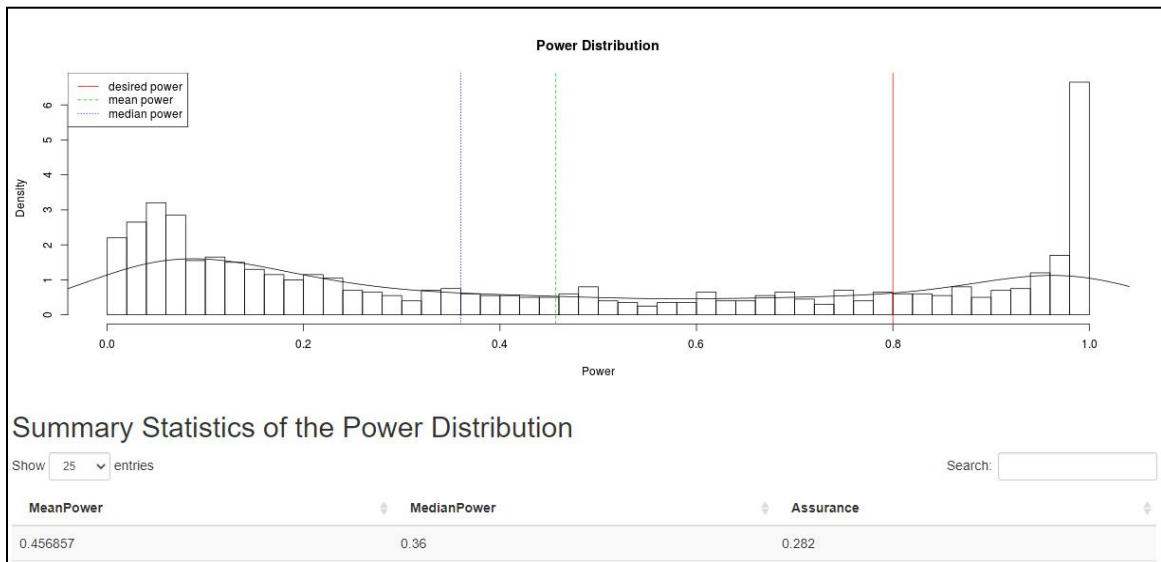

The power of sex-specific mediating role of the latent methylation factor 5 in the relationship between maternal pregnancy-related anxiety and children's hyperactivity in girls
